# Supplementary material for: sandbox – Creating and Analysing Synthetic Sediment Sections with R
Source: Copernicus journal article supplement (doi:10.5194/gchron-2021-39), 2021-12-02
Supplement: Supplementary file 1 [file gchron-2021-39-supplement.zip]

Archive with 3 entries (3 files):
- gleina_grainsize_raw.txt
- gleina_interpolated.txt
- SI_01.pdf
