# Supplementary material for: sandbox – Creating and Analysing Synthetic Sediment Sections with R
Source: Copernicus journal article supplement (doi:10.5194/gchron-2021-39), 2021-12-02
Supplement: Supplementary file 1 [file gchron-2021-39-supplement.zip › gleina_grainsize_raw.txt]

depth_cm	age_ka	sample_ID	pH	CaCO3	C	N	Fe_pedo	Fe_tot	Mn	Zn	K	Na	Mg	Al	Ca	Sr	koehn_2000	Koehn_630	Koehn_200	Koehn_125	Koehn_63	Koehn_20	Koehn_6.3	Koehn_2	Humus	GSD_0.011	GSD_0.013	GSD_0.015	GSD_0.017	GSD_0.02	GSD_0.023	GSD_0.026	GSD_0.03	GSD_0.034	GSD_0.039	GSD_0.044	GSD_0.051	GSD_0.058	GSD_0.067	GSD_0.076	GSD_0.087	GSD_0.1	GSD_0.115	GSD_0.131	GSD_0.15	GSD_0.172	GSD_0.197	GSD_0.226	GSD_0.259
-55	NA	3	7.29	0.8	0.29	0.03	8.881	26.82	411.60	52.70	20.50	7.25	5.54	52.64	11.68	141.50	0.6932	3.0845	2.2871	3.1536	44.4623	23.6238	4.4359	18.2595	0.50	0	0	0	0	0	0	0	0	0	0	0	0	0	0	0	0	0	0	0	0	0	0	0	0
-63	NA	4	7.29	0.8	0.24	0.02	7.068	24.37	419.20	48.30	19.50	7.59	5.52	51.52	7.45	84.52	0.2529	1.3984	1.2882	2.6131	47.9377	24.7848	4.1818	17.5431	0.41	0	0	0	0	0	0	0	0	0	0	0	0	0	0	0	0	0	0	0	0	0	0	0	0
-75	NA	5	7.31	1.2	0.24	0.02	6.088	21.63	410.40	46.10	19.40	7.16	5.26	45.68	8.44	112.30	0.4704	1.8431	0.8305	2.7778	49.5680	26.3014	3.8441	14.3646	0.41	0	0	0	0	0	0	0	0	0	0	0	0	0	0	0	0	0	0	0	0	0	0	0	0
-91	NA	6	7.26	1.0	0.21	0.02	5.590	20.93	400.00	44.40	19.70	7.72	4.80	45.89	6.67	113.30	0.3774	0.9517	0.6671	4.6649	59.7776	16.5256	3.0603	13.9753	0.36	0	0	0	0	0	0	0	0	0	0	0	0	0	0	0	0	0	0	0	0	0	0	0	0
-95	NA	7	7.30	1.0	0.23	0.02	6.551	19.88	390.80	44.20	18.60	7.35	4.78	43.45	7.16	81.34	0.5151	1.1078	0.6988	5.2721	56.9748	17.1690	3.1713	15.0912	0.40	0	0	0	0	0	0	0	0	0	0	0	0	0	0	0	0	0	0	0	0	0	0	0	0
-109	NA	8	7.81	6.8	0.16	0.01	5.784	18.41	341.90	41.70	17.40	6.88	6.34	39.48	30.81	108.80	0.7393	0.7968	0.7906	7.8331	61.9128	12.4236	2.9776	12.5263	0.28	0	0	0	0	0	0	0	0	0	0	0	0	0	0	0	0	0	0	0	0	0	0	0	0
-135	NA	9	7.93	7.2	0.12	0.01	5.012	18.23	386.90	41.60	18.20	7.14	8.13	40.40	35.93	127.10	0.2432	0.4527	0.5416	6.2806	62.6424	15.6351	2.7591	11.4453	0.21	0	0	0	0	0	0	0	0	0	0	0	0	0	0	0	0	0	0	0	0	0	0	0	0
-163	NA	10	7.79	7.2	0.15	0.01	5.104	18.51	398.90	43.10	18.20	7.23	8.21	40.90	39.16	118.40	0.1547	0.3541	0.4518	6.1388	59.3221	18.3156	3.2561	12.0069	0.26	0	0	0	0	0	0	0	0	0	0	0	0	0	0	0	0	0	0	0	0	0	0	0	0
-189	NA	11	7.82	6.4	0.20	0.01	4.388	18.19	418.00	45.40	17.80	7.45	8.36	41.16	38.00	128.20	0.1919	0.3043	0.3585	5.5425	64.0491	14.5346	2.8100	12.2091	0.34	0	0	0	0	0	0	0	0	0	0	0	0	0	0	0	0	0	0	0	0	0	0	0	0
-199	NA	12	7.80	7.1	0.24	0.01	4.966	19.04	348.10	44.80	18.30	7.51	7.91	41.75	36.97	132.90	0.2972	0.3011	0.5438	6.5331	63.2009	14.1657	2.5756	12.3826	0.41	0	0	0	0	0	0	0	0	0	0	0	0	0	0	0	0	0	0	0	0	0	0	0	0
-209	NA	13	7.81	7.3	0.27	0.02	5.347	19.67	332.30	46.20	18.50	7.66	8.19	43.13	38.50	144.60	0.1762	0.2667	0.3310	6.1667	61.2285	14.9908	3.6017	13.2386	0.47	0	0	0	0	0	0	0	0	0	0	0	0	0	0	0	0	0	0	0	0	0	0	0	0
-221	NA	14	7.86	6.6	0.27	0.01	5.120	18.95	455.10	44.50	18.40	7.36	7.44	41.85	32.84	141.50	0.1474	0.2755	0.4643	9.3855	60.9621	11.8089	3.0279	13.9284	0.47	0	0	0	0	0	0	0	0	0	0	0	0	0	0	0	0	0	0	0	0	0	0	0	0
-237	NA	15	7.78	7.4	0.19	0.01	5.687	19.66	373.70	52.20	17.80	7.43	7.69	42.50	35.81	155.70	0.1919	0.2428	0.4539	7.0741	59.1188	16.5072	2.9751	13.4361	0.33	0	0	0	0	0	0	0	0	0	0	0	0	0	0	0	0	0	0	0	0	0	0	0	0
-279	22.9	16	7.77	6.9	0.14	0.01	5.652	18.91	388.20	45.20	17.10	7.30	7.66	42.37	34.43	154.90	0.1387	0.3599	0.4563	4.7324	61.9573	17.4070	2.7537	12.1948	0.24	0	0	0	0	0	0	0	0	0	0	0	0	0	0	0	0	0	0	0	0	0	0	0	0
-287	NA	17	7.78	7.4	0.14	0.01	6.301	21.22	408.80	49.30	18.60	8.12	8.20	43.71	37.13	172.10	0.2607	0.3345	0.3356	2.9122	57.8702	18.4833	3.8507	15.9528	0.24	0	0	0	0	0	0	0	0	0	0	0	0	0	0	0	0	0	0	0	0	0	0	0	0
-295	NA	18	7.80	7.4	0.10	0.01	4.918	19.49	389.30	42.40	18.40	7.69	7.81	42.29	36.87	160.10	0.2363	1.2435	1.2881	3.4836	61.9825	14.5271	3.2928	13.9461	0.17	0	0	0	0	0	0	0	0	0	0	0	0	0	0	0	0	0	0	0	0	0	0	0	0
-303	NA	19	7.70	9.2	0.14	0.01	5.459	22.17	456.30	49.00	20.00	8.75	9.37	46.68	40.13	183.80	0.2190	0.2936	0.3339	2.0241	56.0777	22.8828	4.7141	13.4547	0.24	0	0	0	0	0	0	0	0	0	0	0	0	0	0	0	0	0	0	0	0	0	0	0	0
-315	NA	20	7.69	9.7	0.14	0.02	6.132	22.94	446.80	48.10	19.60	7.90	9.82	46.61	41.77	165.30	0.3412	0.2807	0.2817	1.5255	46.0075	29.4370	5.3610	16.7654	0.24	0	0	0	0	0	0	0	0	0	0	0	0	0	0	0	0	0	0	0	0	0	0	0	0
-323	NA	21	7.70	8.5	0.15	0.01	6.051	21.16	417.90	46.60	18.50	7.86	8.62	44.62	36.86	170.80	0.1498	0.2176	0.3067	2.8674	51.5187	25.6075	4.6559	14.6763	0.26	0	0	0	0	0	0	0	0	0	0	0	0	0	0	0	0	0	0	0	0	0	0	0	0
-331	NA	22	7.72	10.0	0.16	0.02	5.764	22.15	487.90	49.80	19.10	7.86	9.14	45.46	45.09	168.30	0.2524	0.3355	0.3517	2.2752	43.9841	29.9984	5.2700	17.5328	0.28	0	0	0	0	0	0	0	0	0	0	0	0	0	0	0	0	0	0	0	0	0	0	0	0
-341	NA	23	7.72	7.2	0.14	0.01	6.285	22.03	383.10	45.60	18.80	7.89	8.10	43.20	32.57	154.00	0.1195	0.2526	0.3699	3.9980	55.3326	22.4265	3.0391	14.4619	0.24	0	0	0	0	0	0	0	0	0	0	0	0	0	0	0	0	0	0	0	0	0	0	0	0
-349	NA	24	7.75	7.1	0.18	0.02	5.802	20.36	380.40	44.80	18.00	7.79	7.62	44.99	32.16	180.90	0.0165	0.1226	0.3658	4.8342	65.7664	13.8148	3.0159	12.0637	0.31	0	0	0	0	0	0	0	0	0	0	0	0	0	0	0	0	0	0	0	0	0	0	0	0
-371	23.9	25	7.80	7.8	0.10	0.01	5.770	20.53	407.10	45.70	17.80	8.09	8.06	44.84	36.96	127.30	0.0414	0.1045	0.2889	2.6329	64.9831	16.8621	3.0569	12.0303	0.17	0	0	0	0	0	0	0	0	0	0	0	0	0	0	0	0	0	0	0	0	0	0	0	0
-389	NA	26	7.78	7.1	0.13	0.01	5.356	19.63	352.80	42.60	17.60	8.06	7.70	43.76	35.89	126.20	0.0995	0.1249	0.2908	4.4381	67.9183	13.2714	1.7565	12.1004	0.22	0	0	0	0	0	0	0	0	0	0	0	0	0	0	0	0	0	0	0	0	0	0	0	0
-411	NA	27	7.70	7.3	0.17	0.01	5.695	20.32	384.00	47.60	17.90	8.47	7.95	43.84	40.16	144.00	0.3665	0.7096	0.6223	4.2933	63.5520	15.4312	3.7563	11.2688	0.29	0	0	0	0	0	0	0	0	0	0	0	0	0	0	0	0	0	0	0	0	0	0	0	0
-427	NA	28	7.75	6.4	0.19	0.02	5.348	20.94	353.70	43.50	18.90	8.64	7.97	47.18	34.51	147.50	0.1086	0.1720	0.3711	3.5185	66.8698	13.1728	3.5195	12.2678	0.33	0	0	0	0	0	0	0	0	0	0	0	0	0	0	0	0	0	0	0	0	0	0	0	0
-435	NA	29	7.82	7.0	0.12	0.01	5.168	18.64	363.90	40.00	17.30	7.75	7.36	44.37	32.75	128.20	0.0646	0.2300	0.4217	2.6430	67.5880	13.3158	3.2281	12.5088	0.21	0	0	0	0	0	0	0	0	0	0	0	0	0	0	0	0	0	0	0	0	0	0	0	0
-445	NA	30	7.81	6.4	0.11	0.01	5.476	19.58	359.00	41.20	17.80	8.49	7.64	44.25	34.05	148.60	0.1074	0.1755	0.4733	3.3037	66.0519	14.0400	3.9355	11.9127	0.19	0	0	0	0	0	0	0	0	0	0	0	0	0	0	0	0	0	0	0	0	0	0	0	0
-465	NA	31	7.77	6.5	0.11	0.01	4.841	19.28	389.40	39.80	17.40	8.20	7.38	43.41	34.02	164.40	0.2018	0.3782	0.4190	2.6727	70.2330	14.1689	2.5484	9.3780	0.19	0	0	0	0	0	0	0	0	0	0	0	0	0	0	0	0	0	0	0	0	0	0	0	0
-491	NA	32	7.80	6.8	0.14	0.01	4.813	18.50	386.50	39.80	16.90	7.83	7.36	42.54	33.00	134.90	0.2734	0.3693	0.4774	2.9969	69.3623	15.0965	2.3461	9.0783	0.24	0	0	0	0	0	0	0	0	0	0	0	0	0	0	0	0	0	0	0	0	0	0	0	0
-517	NA	33	7.77	6.9	0.12	0.01	5.272	18.23	381.50	40.20	16.20	8.00	7.91	43.20	35.02	126.90	0.0422	0.0945	0.3700	2.7729	70.5797	14.3774	2.2119	9.5514	0.21	0	0	0	0	0	0	0	0	0	0	0	0	0	0	0	0	0	0	0	0	0	0	0	0
-529	26.1	34	7.86	8.2	0.11	0.01	5.367	19.24	398.30	43.30	16.90	8.68	8.35	42.53	40.78	146.40	0.0170	0.1052	0.3195	2.1131	70.6052	15.5231	2.2033	9.1136	0.19	0	0	0	0	0	0	0	0	0	0	0	0	0	0	0	0	0	0	0	0	0	0	0	0
-537	NA	35	7.74	8.8	0.13	0.01	6.008	20.23	435.50	44.50	17.60	8.37	8.98	44.88	41.20	131.90	0.0389	0.1783	0.3427	2.5133	61.1645	22.1149	3.2873	10.3601	0.22	0	0	0	0	0	0	0	0	0	0	0	0	0	0	0	0	0	0	0	0	0	0	0	0
-545	NA	36	7.80	8.0	0.15	0.01	6.035	21.71	450.80	49.00	18.90	8.24	9.12	47.02	39.78	138.30	0.0661	0.2646	0.4028	4.3030	54.4905	24.9748	2.8627	12.6355	0.26	0	0	0	0	0	0	0	0	0	0	0	0	0	0	0	0	0	0	0	0	0	0	0	0
-553	NA	37	7.73	8.1	0.14	0.02	5.710	19.47	445.70	44.50	16.80	7.48	8.63	45.99	35.77	142.50	0.0173	0.2007	0.3015	3.7341	55.3088	25.0570	3.1576	12.2229	0.24	0	0	0	0	0	0	0	0	0	0	0	0	0	0	0	0	0	0	0	0	0	0	0	0
-569	NA	38	7.71	7.1	0.13	0.01	5.551	21.14	433.60	45.00	18.10	7.84	8.46	47.18	35.28	150.00	0.0758	0.1416	0.2902	2.9472	58.3460	22.3410	3.2913	12.5668	0.22	0	0	0	0	0	0	0	0	0	0	0	0	0	0	0	0	0	0	0	0	0	0	0	0
-579	NA	39	7.73	7.8	0.15	0.01	5.888	19.80	366.50	52.50	17.10	9.59	8.21	43.92	30.85	124.30	0.0000	0.0943	0.2747	2.1165	60.9212	22.3006	2.4328	11.8599	0.26	0	0	0	0	0	0	0	0	0	0	0	0	0	0	0	0	0	0	0	0	0	0	0	0
-599	NA	40	7.71	8.1	0.15	0.01	5.669	21.61	416.10	43.60	18.40	9.62	8.65	43.57	34.07	128.40	0.0487	0.0794	0.2065	1.7634	58.0858	25.0216	2.5816	12.2129	0.26	0	0	0	0	0	0	0	0	0	0	0	0	0	0	0	0	0	0	0	0	0	0	0	0
-611	NA	41	7.77	7.3	0.15	0.02	5.889	20.94	308.10	44.50	18.20	8.78	8.59	42.38	32.88	144.30	0.0194	0.0918	0.2387	2.0349	59.1607	22.8483	3.9780	11.6281	0.26	0	0	0	0	0	0	0	0	0	0	0	0	0	0	0	0	0	0	0	0	0	0	0	0
-621	NA	42	7.75	7.9	0.15	0.01	6.003	20.99	364.70	51.40	17.80	8.85	8.46	42.50	35.72	126.50	0.0010	0.1055	0.2658	2.6337	56.7694	23.3696	4.4464	12.4086	0.26	0	0	0	0	0	0	0	0	0	0	0	0	0	0	0	0	0	0	0	0	0	0	0	0
-631	27	43	7.72	7.4	0.12	0.01	6.392	20.19	312.40	58.60	16.90	8.94	8.16	40.37	33.31	146.90	0.0241	0.0543	0.1326	2.2226	62.0968	20.4980	3.7178	11.2538	0.21	0	0	0	0	0	0	0	0	0	0	0	0	0	0	0	0	0	0	0	0	0	0	0	0
-661	NA	44	7.70	7.2	0.12	0.01	6.138	19.74	332.20	36.40	17.00	10.11	8.71	40.73	34.67	131.70	0.0232	0.0433	0.1653	1.6075	62.1819	22.3734	3.6281	9.9773	0.21	0	0	0	0	0	0	0	0	0	0	0	0	0	0	0	0	0	0	0	0	0	0	0	0
-701	NA	45	7.68	7.3	0.13	0.02	5.994	19.91	314.70	36.50	17.00	9.99	8.51	40.70	32.92	150.20	0.0397	0.1140	0.1804	1.6170	61.4665	22.9012	2.0819	11.5993	0.22	0	0	0	0	0	0	0	0	0	0	0	0	0	0	0	0	0	0	0	0	0	0	0	0
-759	NA	46	7.71	7.1	0.15	0.02	5.901	21.18	298.00	38.70	18.50	9.14	8.90	42.82	31.38	120.80	0.1012	0.0681	0.1693	1.9600	56.1156	25.1518	3.9081	12.5258	0.26	0	0	0	0	0	0	0	0	0	0	0	0	0	0	0	0	0	0	0	0	0	0	0	0
-791	27.6	47	7.68	6.6	0.18	0.02	5.832	23.23	348.80	43.70	20.40	9.39	9.50	45.61	29.97	111.30	0.1321	0.2455	0.3264	2.7571	49.6006	27.7093	5.8180	13.4109	0.31	0	0	0	0	0	0	0	0	0	0	0	0	0	0	0	0	0	0	0	0	0	0	0	0
-811	NA	48	7.67	6.9	0.17	0.02	5.644	23.28	342.20	46.30	20.90	9.44	10.58	50.96	29.42	141.20	0.0448	0.2850	0.2983	1.9545	40.7179	35.1192	6.1077	15.4728	0.29	0	0	0	0	0	0	0	0	0	0	0	0	0	0	0	0	0	0	0	0	0	0	0	0
-853	NA	49	7.66	8.3	0.23	0.02	6.709	22.45	390.00	50.90	19.70	10.37	9.73	49.64	42.67	108.90	0.0267	0.3613	0.5593	2.2363	43.9534	30.7872	7.2266	14.8491	0.40	0	0	0	0	0	0	0	0	0	0	0	0	0	0	0	0	0	0	0	0	0	0	0	0
-901	NA	50	7.62	7.0	0.19	0.02	6.390	23.18	376.40	71.40	19.10	9.84	8.50	50.55	30.85	113.70	0.0000	0.0542	0.0843	1.7180	46.8640	29.8043	5.9207	15.5544	0.33	0	0	0	0	0	0	0	0	0	0	0	0	0	0	0	0	0	0	0	0	0	0	0	0
-931	NA	51	7.57	6.4	0.21	0.02	7.655	23.26	384.20	58.50	18.20	9.14	7.55	53.51	28.53	101.60	0.0442	0.4217	0.0000	2.3671	34.4922	32.3890	7.4663	22.8195	0.36	0	0	0	0	0	0	0	0	0	0	0	0	0	0	0	0	0	0	0	0	0	0	0	0
-989	39	52	7.01	1.0	0.24	0.03	6.771	24.26	209.30	57.80	19.10	8.43	6.26	59.83	6.17	91.79	0.0265	0.2774	0.0000	1.8888	35.5941	28.3529	9.3830	24.4773	0.41	0	0	0	0	0	0	0	0	0	0	0	0	0	0	0	0	0	0	0	0	0	0	0	0
-1001	45.6	53	6.77	0.6	0.23	0.03	3.999	22.19	164.70	56.00	20.20	9.51	6.31	60.78	6.17	76.45	0.0275	0.2303	0.0000	2.0057	37.1990	27.2113	8.8666	24.4596	0.40	0	0	0	0	0	0	0	0	0	0	0	0	0	0	0	0	0	0	0	0	0	0	0	0
-1013	NA	54	6.82	0.7	0.25	0.03	4.597	23.49	180.00	60.70	19.90	8.85	6.79	62.65	6.56	91.56	0.1136	0.3418	0.0000	1.7676	31.8008	30.6650	8.8794	26.4318	0.43	0	0	0	0	0	0	0	0	0	0	0	0	0	0	0	0	0	0	0	0	0	0	0	0
-1027	NA	55	6.71	0.5	0.12	0.02	8.691	24.36	785.90	46.40	19.40	8.27	5.35	54.07	5.24	97.47	0.2177	1.2896	0.0000	2.7250	46.7211	20.2951	5.8137	22.9377	0.21	0	0	0	0	0	0	0	0	0	0	0	0	0	0	0	0	0	0	0	0	0	0	0	0
-1041	NA	56	6.75	0.6	0.11	0.02	10.830	23.41	191.30	40.80	17.50	7.20	4.77	49.16	4.94	69.34	0.0114	0.3676	0.2534	2.4839	54.7243	17.5491	4.8805	19.7298	0.19	0	0	0	0	0	0	0	0	0	0	0	0	0	0	0	0	0	0	0	0	0	0	0	0
-1061	NA	57	6.85	0.6	0.13	0.02	10.400	24.08	188.50	43.30	19.00	7.96	4.80	48.77	5.19	70.11	0.0010	0.1999	0.1970	1.8050	59.8738	15.8749	3.7237	18.3247	0.22	0	0	0	0	0	0	0	0	0	0	0	0	0	0	0	0	0	0	0	0	0	0	0	0
-1083	72.8	58	7.57	3.9	0.13	0.02	9.080	23.40	265.70	44.20	19.10	8.82	5.31	47.77	18.11	100.20	0.0012	0.2618	0.2970	3.5323	54.2343	18.7824	4.2260	18.6650	0.22	0	0	0	0	0	0	0	0	0	0	0	0	0	0	0	0	0	0	0	0	0	0	0	0
-1101	NA	59	7.57	4.5	0.12	0.02	8.249	21.95	272.90	39.50	18.20	8.53	5.68	46.58	22.17	97.37	0.0010	0.2632	0.1699	1.6394	60.5175	17.7200	3.0052	16.6838	0.21	0	0	0	0	0	0	0	0	0	0	0	0	0	0	0	0	0	0	0	0	0	0	0	0
-1121	NA	60	7.61	5.0	0.13	0.02	6.768	21.19	278.10	37.90	18.80	8.83	5.84	47.00	23.03	109.10	0.0042	0.1826	0.1815	2.6655	61.8107	14.7968	3.3581	17.0006	0.22	0	0	0	0	0	0	0	0	0	0	0	0	0	0	0	0	0	0	0	0	0	0	0	0
[truncated: 68 more columns]
