# Supplementary material for: sandbox – Creating and Analysing Synthetic Sediment Sections with R
Source: Copernicus journal article supplement (doi:10.5194/gchron-2021-39), 2021-12-02
Supplement: Supplementary file 1 [file gchron-2021-39-supplement.zip › gleina_interpolated.txt]

depth_int	sample_ID	pH	CaCO3	C	N	Fe_pedo	Fe_tot	Mn	Zn	K	Na	Mg	Al	Ca	Sr	X2000	X630	X200	X125	X63	X20	X6.3	X2	Humus	EM_1	EM_2	EM_3	age_int	X_EM	X_EM.1	X_EM.2	X_EM.3	X_EM.4	X_EM.5	X_EM.6
1	50	2.5	7.305	0.75	0.315	0.03	9.5555	27.42	470.95	52.3	20.45	7.1425	5.456	53.23	11.545	134.55	0.608939917525181	3.57447676055007	2.3591525455985	3.39194367214002	45.9504709489254	21.9127242007173	3.67528861225908	18.5270033422844	0.54306	0	0.491793947602066	0.508206052397934	1466.74003704919	0.178609369891482	0.153675292207358	0.141322036795986	0.194193169128565	0.0781625444416122	0.254037587534997	0
2	75	5	7.31	1.2	0.24	0.02	6.088	21.63	410.4	46.1	19.4	7.164	5.258	45.68	8.44	112.3	0.470390677160282	1.84312218018497	0.830517733222751	2.77783397738082	49.5680498512926	26.3014142068103	3.84405284561258	14.3646185283358	0.41376	0.514723209813605	0.485276790186395	0	4094.67019691404	0.270606822093818	0.151759574533513	0.138895461075783	0.23733824120637	0.0950453987329275	0.106354502357589	0
3	100	7.35714285714286	7.48214285714286	3.07142857142857	0.205	0.0164285714285714	6.27707142857143	19.355	373.335714285714	43.3071428571429	18.1714285714286	7.18085714285714	5.3365	42.0321428571429	15.6038571428571	91.1471428571429	0.595136592781437	0.996700979119815	0.731576425995804	6.18671190498343	58.7383564704213	15.4742127261654	3.10213474605853	14.1751701544743	0.35342	0.59680327186503	0	0.40319672813497	6891.63417256886	0.261692388350833	0.05	0.01	0.133381381533386	0.0543666275565425	0.490559602559238	0
4	125	8.61538461538461	7.88384615384615	7.04615384615385	0.135384615384615	0.01	5.30892307692308	18.2992307692308	369.592307692308	41.6384615384615	17.8923076923077	7.03815384615385	7.44215384615385	40.0461538461538	33.9607692307692	120.061538461538	0.433998813967516	0.585029886749502	0.637371387644465	6.87769229020923	62.3618125942433	14.399896393948	2.84314252625609	11.8610561069819	0.233403076923077	0	0.654069910011833	0.345930089988167	9744.942753487	0.248228122680559	0.05	0.01	0.126792485567082	0.0517883639175539	0.513191027834805	0
5	150	9.53571428571429	7.855	7.2	0.136071428571429	0.01	5.06128571428571	18.38	393.328571428571	42.4035714285714	18.2	7.18896428571429	8.17117857142857	40.6678571428571	37.6603571428571	122.439285714286	0.195776056345487	0.399879840216133	0.493487493876723	6.20461699306998	60.8636912766232	17.0710511483935	3.02536447254086	11.7461327189341	0.234587142857143	0	0.379832668301745	0.620167331698255	12552.9878348436	0.216594737661698	0.05	0.01	0.111312318430193	0.0457309072118145	0.566362036696295	0
6	175	10.4615384615385	7.80384615384615	6.83076923076923	0.173076923076923	0.01	4.77353846153846	18.3623076923077	407.715384615385	44.1615384615385	18.0153846153846	7.33553846153846	8.27753846153846	41.02	38.6246153846154	122.923076923077	0.171830354803466	0.331096473678791	0.408739292291674	5.86358204975035	61.5038245319307	16.5705118496633	3.05021976229515	12.1001956855865	0.298384615384615	0	0.518447175393992	0.481552824606008	15235.0463788314	0.240306078673312	0.05	0.01	0.122915740627365	0.0502713767672299	0.526506803932093	0
7	200	12.1	7.801	7.12	0.243	0.011	5.0041	19.103	346.52	44.94	18.32	7.5204	7.9392	41.888	37.123	134.07	0.285083438401421	0.297702487900355	0.522556386424295	6.49642492066296	63.0036165936934	14.2482134159395	2.67819255102588	12.4682102059522	0.418932	0	0.568299737753221	0.431700262246779	17727.3822027115	0.327245027464299	0.05	0.01	0.165460332588912	0.0669192605782699	0.38037537936852	0
8	225	14.25	7.84	6.8	0.25	0.01	5.26175	19.1275	434.75	46.425	18.25	7.378	7.5005	42.0125	33.5825	145.05	0.158505011511189	0.267357685925117	0.461697453416931	8.80767597747978	60.5012488685231	12.9834566667015	3.01472145908098	13.8053368773613	0.431	0	0.369873293732922	0.630126706267078	19849.2793758692	0.319079808508991	0.05	0.01	0.161464587142698	0.06535570801236	0.394099896335951	0
9	250	15.3095238095238	7.77690476190476	7.2452380952381	0.17452380952381	0.01	5.67616666666667	19.4278571428571	378.188095238095	50.0333333333333	17.5833333333333	7.39114285714286	7.68109523809524	42.4597619047619	35.3828571428571	155.452380952381	0.175453340052848	0.27906470895226	0.454682100471712	6.34927401915994	59.997360117141	16.7857169970954	2.90658102861304	13.0518676885138	0.300879047619048	0	0.478901716209877	0.521098283790123	21412.9726315204	0.28331189007162	0.05	0.01	0.143961137694623	0.0585065321413741	0.454220440092383	0
10	275	15.9047619047619	7.77095238095238	6.94761904761905	0.144761904761905	0.01	5.65533333333333	18.9814285714286	386.819047619048	45.8666666666667	17.1666666666667	7.31257142857143	7.66204761904762	42.3823809523809	34.5614285714286	154.97619047619	0.143740328853786	0.348786660911192	0.456094196768077	4.95537785971097	61.6869284002539	17.3213398658051	2.77474908155438	12.3129836061426	0.249569523809524	0	0.215505423854902	0.784494576145097	22694.8927767614	0.355908097718091	0.05	0.01	0.179486941436513	0.0724079336055919	0.332197027239804	0
11	300	18.625	7.7375	8.525	0.125	0.01	5.256125	21.165	431.175	46.525	19.4	8.348125	8.78575	45.03375	38.9075	174.9125	0.225495246783108	0.649850505085066	0.691722937672073	2.57141610650804	58.2919911345876	19.7494566550927	4.18109617995298	13.6389712343185	0.2155	0	0.655129912896655	0.344870087103345	23397.240502066	0.263822149203911	0.116063556995274	0.0936805055273472	0.199081554329203	0.0800753908244708	0.247276843119794	0
12	325	21.25	7.705	8.875	0.1525	0.0125	5.97925	21.4075	435.4	47.4	18.65	7.85775	8.75225	44.83	38.9175	170.175	0.175437121341012	0.247073864018653	0.317929994516293	2.71938216046307	49.6350822929346	26.7052545928235	4.80943452906007	15.3904054448428	0.26291	0.601411246282629	0.398588753717371	0	23677.0365960919	0.138403285645759	0.145649957922729	0.13115661336879	0.166663268814851	0.0673899747536373	0.350736899494234	0
13	350	24.0454545454545	7.75227272727273	7.13181818181818	0.176363636363636	0.0195454545454545	5.80054545454545	20.3677272727273	381.613636363636	44.8409090909091	17.9909090909091	7.80263636363636	7.63504545454545	44.9831818181818	32.3781818181818	178.463636363636	0.0176696560424187	0.121761618411324	0.362306993464744	4.73415955661197	65.7308253674059	13.9533528315985	3.01777767951462	12.0621462969505	0.304050909090909	0.560426991457183	0.439573008542817	0	23792.2616640892	0.263429493892623	0.050989594512244	0.0112534863821757	0.135199993767948	0.0550782584309362	0.484049173014073	0
14	375	25.2222222222222	7.79555555555556	7.64444444444444	0.106666666666667	0.01	5.678	20.33	395.033333333333	45.0111111111111	17.7555555555556	8.08322222222222	7.97577777777778	44.6	36.7222222222222	127.055555555556	0.0543311534064217	0.109054515739443	0.289340293385141	3.03401978167936	65.6353671164855	16.0641481120438	2.76789898550424	12.0458400417561	0.183893333333333	0.426076156659275	0.573923843340725	0	23936.5907559411	0.0710931302023999	0.05	0.01	0.0401094041415999	0.0178688972728	0.8109285683832	0
15	400	26.5	7.74	7.2	0.15	0.01	5.5255	19.975	368.4	45.1	17.75	8.2645	7.8215	43.8	38.025	135.1	0.233012760751288	0.41726877834062	0.456561093209363	4.365713089921	65.735175475958	14.351279445456	2.75638887466892	11.6846004816948	0.2586	0	0.674844507375877	0.325155492624123	24198.9328517482	0.0654014269234516	0.05	0.01	0.0373241025370082	0.0167789966449163	0.820495473894624	0
16	425	27.875	7.74375	6.5125	0.1875	0.01875	5.391375	20.8625	357.4875	44.0125	18.775	8.617375	7.96725	46.7625	35.21625	147.0625	0.140836743528435	0.239160810025645	0.402460726138007	3.61531416430367	66.4550673330981	13.455134952569	3.54906341332555	12.1429618570115	0.32325	0	0.838945217126473	0.161054782873527	24534.0929585707	0.03	0.05	0.01	0.02	0.01	0.88	0
17	450	30.25	7.8	6.425	0.11	0.01	5.31725	19.505	366.6	40.85	17.7	8.41625	7.5765	44.04	34.0425	152.55	0.131028222013309	0.226169585356969	0.459726917184912	3.14592548301986	67.0971688683314	14.0722420849234	3.58868586696301	11.2790529722071	0.18964	0	0.985900233452442	0.0140997665475575	24924.3893611964	0.0337900211488389	0.053344136307799	0.0142359059898787	0.0251276756719584	0.0120064817846794	0.861495779096845	0
18	475	31.3846153846154	7.78153846153846	6.61538461538461	0.121538461538462	0.01	4.83023076923077	18.98	388.284615384615	39.8	17.2076923076923	8.058	7.373	43.0753846153846	33.6276923076923	153.053846153846	0.229345447171116	0.374744852058848	0.44142245509548	2.79739373559228	69.8981198146821	14.5256835063369	2.47056376596574	9.26272642309747	0.209532307692308	0	0.997574782216437	0.00242521778356268	25327.1841651705	0.111742181558573	0.0620884533311819	0.0253120408861638	0.0718327452996072	0.0302823785954985	0.698742200328976	0
19	500	32.3461538461538	7.78961538461538	6.83461538461538	0.133076923076923	0.01	4.97188461538462	18.4065384615385	384.769230769231	39.9384615384615	16.6576923076923	7.89042307692308	7.54946153846154	42.7684615384615	33.6992307692308	132.130769230769	0.193358348873083	0.274148538245871	0.44020388950217	2.91934060585748	69.783697938199	14.8475603499837	2.29963109121406	9.24205923812461	0.229424615384615	0.0615422061041156	0.938457793895884	0	25710.8311909562	0.190261464060213	0.0670518896025426	0.0315990601632207	0.115114906278763	0.0472188763699507	0.54875380352531	0
20	525	33.6666666666667	7.83	7.76666666666667	0.113333333333333	0.01	5.33533333333333	18.9033333333333	392.7	42.2666666666667	16.6666666666667	8.45233333333333	8.207	42.7533333333333	38.86	139.9	0.025425972612164	0.101607274135761	0.336314195897291	2.33307182775293	70.5967074629447	15.141203023189	2.20615526838055	9.2595149750876	0.195386666666667	0	0.678628819258375	0.321371180741625	26051.214317379	0.143535221156792	0.05	0.01	0.0755597890767281	0.031740787030024	0.689164202736456	0
21	550	36.625	7.75625	8.0625	0.14375	0.01625	5.831875	20.31	447.6125	46.1875	17.5875	7.763875	8.811625	46.37625	37.27375	140.925	0.0356244775447132	0.224620832277926	0.339470635835096	3.94743457921504	55.001970668896	25.0262106643022	3.04701931157829	12.3776488303508	0.247825	0	0.537553703551044	0.462446296448956	26341.4662891772	0.247272014850595	0.05	0.01	0.126324603011993	0.0516052794394756	0.514798102697937	0
22	575	38.6	7.722	7.52	0.142	0.01	5.7532	20.336	393.34	49.5	17.5	8.8878	8.30855	45.224	32.622	134.58	0.0303199553179607	0.113212904818549	0.280915310960147	2.44880623777485	59.8911174705557	22.3167752350918	2.77620081403849	12.1426520714425	0.244808	0	0.552694952483136	0.447305047516864	26615.0879874416	0.216546894465162	0.05	0.01	0.1112889058021	0.045721745748648	0.56644245398409	0
23	600	40.0833333333333	7.715	8.03333333333333	0.15	0.0108333333333333	5.68733333333333	21.5541666666667	407.1	43.675	18.3833333333333	9.54983333333333	8.64385416666667	43.4708333333333	33.9708333333333	129.725	0.0462136981181448	0.0804642631744611	0.209207084253513	1.78605163931043	58.1754217118283	24.8404866285713	2.69796458082948	12.1641903939143	0.2586	0	0.357451844431929	0.642548155568071	26840.9996264465	0.226197914578457	0.05	0.01	0.116011745432011	0.0475698134299173	0.550220526559614	0
24	625	42.4	7.738	7.7	0.138	0.01	6.1586	20.67	343.78	54.28	17.44	8.888	8.33925	41.648	34.756	134.66	0.0102665391839231	0.0849876840449449	0.212504308134084	2.46928686873259	58.9003792642983	22.220927896951	4.15496075687964	11.9466866817755	0.237912	0	0.657151699855571	0.342848300144429	26980.4519114229	0.0547059590678964	0.0632811911376961	0.0268228421077484	0.0450887627850136	0.0198173419593531	0.790283902942292	0
25	650	43.6333333333333	7.70733333333333	7.27333333333333	0.12	0.01	6.23113333333333	19.905	324.94	44.54	16.9633333333333	9.68063333333333	8.50854166666667	40.598	34.1713333333333	137.273333333333	0.0235227061089133	0.0473411387156328	0.153310383724882	1.83301879127351	62.1507112387227	21.685742201464	3.66099069197108	10.4453628480193	0.20688	0.161404985917487	0.838595014082513	0	27045.2843694844	0.045896778521195	0.0540706879346399	0.0151562047172105	0.0317633521485302	0.0146030508407292	0.838509925837695	0
26	675	44.35	7.693	7.235	0.1235	0.0135	6.0876	19.7995	326.075	36.435	17	10.0666	8.6429375	40.7195	34.0575	138.175	0.0289462931645141	0.0680719407945276	0.170584444682023	1.61078522975872	61.9315062316293	22.5581320727154	3.08695174412283	10.5450220431327	0.212914	0	0.99647435687236	0.00352564312763974	27111.6514595896	0.0457920976469695	0.0617301439021121	0.0248581822760087	0.0392086141569672	0.017516414235335	0.810894547782607	0
27	700	44.975	7.6805	7.2975	0.12975	0.01975	5.9976	19.90575	315.1375	36.4975	17	9.9891	8.51871875	40.70075	32.96375	149.7375	0.0392438841238623	0.112243526392489	0.180055011639806	1.61672707230287	61.4843570006879	22.8880218419152	2.12058358392335	11.5587680790145	0.223689	0.0266855555386398	0.97331444446136	0	27183.3475730926	0.0671298144398846	0.0826768294415981	0.0513906506260243	0.0701514869453374	0.0296244948916538	0.699026723655502	0
28	725	45.4137931034483	7.69241379310345	7.21724137931034	0.138275862068966	0.02	5.95551724137931	20.4355172413793	307.789655172414	37.4103448275862	17.6206896551724	9.63468965517241	8.67254310344828	41.5772413793103	32.2827586206897	138.034482758621	0.0651258712351153	0.0950296916139589	0.175846947834268	1.75892595908517	59.2523167282917	23.8324982471169	2.83756543407664	11.9826911207463	0.238387586206897	0	0.968088688256238	0.0319113117437624	27283.3355435016	0.0672832227700225	0.0728722800543303	0.0389715547354851	0.0606306171533981	0.0258989371469819	0.734343388139782	0
29	750	45.8448275862069	7.70534482758621	7.13103448275862	0.146896551724138	0.02	5.91543103448276	20.9829310344828	300.591379310345	38.3586206896552	18.2672413793103	9.26874137931035	8.8379525862069	42.4910344827586	31.6189655172414	125.362068965517	0.0916572081860311	0.0752581309864088	0.171068941080259	1.90680222271071	56.9459059958349	24.8025824288186	3.62468686799462	12.3820382043885	0.253249655172414	0	0.948763653879437	0.0512363461205633	27384.5023412817	0.066553951580878	0.0617864292117812	0.0249294770015895	0.0494237580872793	0.0215136444689354	0.775792739649537	0
30	775	46.5	7.695	6.85	0.165	0.02	5.8665	22.205	323.4	41.2	19.45	9.2655	9.1975	44.215	30.675	116.05	0.116672679809759	0.156839142276735	0.247873324896822	2.35858111077322	52.8581146168096	26.4305558099704	4.86300862707957	12.9683546883839	0.28446	0.15658242355962	0.84341757644038	0	27510.4611942413	0.048145706976393	0.0538977614542317	0.0149371645086935	0.0326946444117383	0.0149674695524193	0.835357253096524	0
31	800	47.45	7.6755	6.735	0.1755	0.02	5.7474	23.2525	345.83	44.87	20.625	9.4165	9.9851875	48.0175	29.7225	124.755	0.0928306171920065	0.263307099228948	0.313735017302867	2.39592418439242	45.6033822147787	31.0437321686287	5.94833693482053	14.3387517636558	0.302562	0.147466846752962	0.852533153247038	0	27650.927695112	0.03	0.05	0.01	0.02	0.01	0.88	0
32	825	48.3333333333333	7.66666666666667	7.36666666666667	0.19	0.02	5.999	23.0033333333333	358.133333333333	47.8333333333333	20.5	9.75266666666667	10.2975	50.52	33.8366666666667	130.433333333333	0.0387692406047156	0.310459626520129	0.385277974434696	2.04839785262119	41.7963815716431	33.6751677594879	6.48064490238742	15.2649010723009	0.32756	0	0.925893681874956	0.0741063181250442	27853.6809701173	0.0367918686818686	0.0559928253075311	0.0175909120562061	0.0291889988048811	0.0135956951845187	0.846839699964994	0
33	850	48.9285714285714	7.66071428571429	8.2	0.225714285714286	0.02	6.63292857142857	22.5092857142857	386.585714285714	50.5714285714286	19.7857142857143	10.3038571428571	9.79080357142857	49.7342857142857	41.7235714285714	111.207142857143	0.0280185249390477	0.355878619263178	0.540670261428356	2.21614923535496	43.7223204536607	31.0966269272705	7.14665656797685	14.8936794101065	0.389131428571429	0	0.990854922499364	0.00914507750063575	28104.5886742473	0.0489202056137769	0.0666942990709796	0.0311461121565741	0.0455979252421687	0.0200165794425878	0.787624878473913	0
34	875	49.4583333333333	7.64166666666667	7.70416666666667	0.211666666666667	0.02	6.56279166666667	22.7845833333333	383.766666666667	60.2958333333333	19.425	10.1247916666667	9.16567708333333	50.0570833333333	37.2525	111.1	0.0144779044903824	0.22055674921491	0.341598780209757	1.9987406549557	45.2874539783662	30.3367121869872	6.62806089164098	15.1723988541348	0.364913333333333	0.0132982690612862	0.986701730938714	0	28849.3231671034	0.074411168116109	0.0891863248083315	0.0596360114238865	0.0800856980394416	0.0335117948849989	0.663169002727233	0
35	900	49.9791666666667	7.62083333333333	7.02708333333333	0.190833333333333	0.02	6.39664583333333	23.1647916666667	376.683333333333	70.9729166666667	19.1125	9.84614583333333	8.52440104166667	50.5310416666667	31.09625	113.6	0.000556842480399326	0.0605883978769171	0.0941913305985774	1.72881026140193	46.8033867725292	29.8247919137859	5.94792785049712	15.5397466308299	0.328996666666667	0	0.999381995979107	0.000618004020892672	29661.397676604	0.10172430683259	0.113286153087579	0.0901624605776004	0.117038768067622	0.0479716918525476	0.529816619582061	0
36	925	50.8	7.58	6.52	0.206	0.02	7.402	23.244	382.64	61.08	18.38	9.275	7.73775	52.918	28.994	104.02	0.0353334595242603	0.348188343936784	0.016859006522826	2.23730778506315	36.9665541596133	31.8720666716952	7.15718171106292	21.3665088625816	0.355144	0.0775974883538231	0.922402511646177	0	31305.5046723306	0.0951222898391758	0.107460843975743	0.0827837357026083	0.108106627429473	0.044476506385446	0.562049996667553	0
37	950	51.3275862068966	7.38655172413793	4.63103448275862	0.219827586206897	0.0232758620689655	7.36541379310345	23.5875862068966	326.905172413793	58.2706896551724	18.4948275862069	8.90470689655172	7.12409482758621	55.5803448275862	21.2051724137931	98.3863793103448	0.0383850126052443	0.37442435791062	0	2.21044723564289	34.8531532555578	31.0668262150089	8.0941716095717	23.3625923137024	0.37898275862069	0.303020828453819	0.69697917154618	0	34097.034765009	0.110153388300461	0.120723577912172	0.0995831986887507	0.12844281946533	0.052434146747303	0.488662868885984	0
38	975	51.7586206896552	7.1451724137931	2.30344827586207	0.232758620689655	0.0275862068965517	6.98437931034483	24.0186206896552	251.51724137931	57.9689655172414	18.8827586206897	8.60168965517241	6.56698275862069	58.3044827586207	11.5672413793103	94.1579310344828	0.0307773654998745	0.312235336786264	0	2.00428376949671	35.3281092780777	29.327117861199	8.92032306082944	24.07715332811	0.401275862068965	0.475998055768838	0.524001944231162	0	37239.9611976955	0.13246224895415	0.14040786672425	0.12451663118405	0.15862539564385	0.0642447200345501	0.379743137459149	0
39	1000	52.9166666666667	6.79	0.633333333333333	0.230833333333333	0.03	4.23	22.3625	168.416666666667	56.15	20.1083333333333	9.41558333333333	6.30885416666667	60.7008333333333	6.17091666666667	77.7283333333333	0.0274337151008377	0.234251329203566	0	1.99594897039388	37.065228289573	27.3064320707439	8.90963384555485	24.4610717794319	0.397956666666667	0.36428955750186	0.63571044249814	0	45050	0.182157078832037	0.184256246028268	0.180057911635806	0.225859577243344	0.0905537476169608	0.137115438643584	0
40	1025	54.8571428571429	6.72571428571429	0.528571428571429	0.138571428571429	0.0214285714285714	8.10614285714286	24.2357142857143	699.342857142857	48.4428571428571	19.4714285714286	8.35185714285714	5.55535714285714	55.2957142857143	5.43228571428571	96.6257142857143	0.202867549651303	1.15418163070073	0	2.58826960859737	44.5895976427028	21.7765397280506	6.25166883427008	23.4368750060277	0.238897142857143	0.934503329730547	0.0654966702694531	0	54831.7740601558	0.19855071775232	0.182954304758309	0.178408786027191	0.232607755897565	0.0931943392642646	0.114284096300351	0
41	1050	56.45	6.795	0.6	0.119	0.02	10.6365	23.7115	190.04	41.925	18.175	7.54055	4.7843125	48.9845	5.05505	69.6865	0.00672335439311685	0.292136252872385	0.227989491631784	2.17839808620106	57.041540702779	16.7957256192549	4.35997399157062	19.0975125012979	0.205156	0.602286652555618	0.397713347444382	0	62695.7280799756	0.204271825876037	0.197864087061981	0.19729451027851	0.25	0.1	0.0505695767834716	0
42	1075	57.6363636363636	7.30818181818182	2.7	0.13	0.02	9.56	23.6472727272727	237.627272727273	43.8727272727273	19.0636363636364	8.50463636363636	5.12488636363636	48.1336363636364	13.4125454545455	89.2581818181818	0.00110336697776036	0.239280403588647	0.260622240767297	2.90418414808728	56.284998769579	17.7251393542346	4.04338882997217	18.5412828867931	0.22412	0.933385583517914	0	0.066614416482086	70317.7551109241	0.18373472046367	0.180876427356863	0.17577680798536	0.223323707001705	0.0895614505658844	0.146726886626518	0
